# Supplementary material
Source: PubMed Central journal article supplement (PMC5705032)
Supplement: NIHMS920287-supplement-suppl.pdf [file NIHMS920287-supplement-suppl.pdf]

- **Supplementary Figure Legends**

- **Supplementary Figure 1, related to Figure 1** Kaplan-Meier plots of *Rpn11* expression versus overall survival of newly diagnosed, MM patients (n=550,  $p < 0.001$ ). Red line points to the patient group with elevated *Rpn11* expression and shorter survival, whereas blue line represents patient cohort with lower *Rpn11* and longer survival.
- **Supplementary Figure 2, related to Figure 1** Relative *Rpn11* expression in normal individuals, patients with MGUS, or MSS, or MM ( $p < 0.00001$ ).
- **Supplementary Figure 3, related to Figure 1** *Rpn11* expression in plasma cells from normal healthy donors (n= 5) and CD138+ tumor cells from MM patients (n=12).
- **Supplementary Figure 4, related to Figure 1** Comparative analysis of *Rpn11* expression in the BM biopsies from normal donors and MM patients. Red arrowheads points to the *Rpn11*+ brown cells. (Scale bar, 5  $\mu$ m).
- **Supplementary Figure 5, related to Figure 3** MM.1S and BMSCs/pDCs were cultured either alone or together in the presence or absence of OPA for 48h, and DNA synthesis was measured by 5-bromo-2'-deoxyuridine (BrdU) uptake (mean  $\pm$  SD; n=3;  $p < 0.0001$ ).
- **Supplementary Figure 6, related to Figure 4** MM.1S cells were cultured in the presence of pan-caspase inhibitor (1h); cells were the treated with OPA (10  $\mu$ M; 24h), and analyzed for cell viability (mean  $\pm$  SD;  $p < 0.0001$ ).
- **Supplementary Figure 7, related to Figure 4** ANBL6.BR cells were treated with OPA or bortezomib, and cell extracts were then analyzed for indicated molecules using immunoblotting.
- **Supplementary Figure 8, related to Figure 6A** OPA adds to the anti-MM activity of immunomodulatory agents Lenalidomide
- **Supplementary Figure 9, related to Figure 6B** OPA adds to the anti-MM activity of immunomodulatory agents Pomalidomide
- **Supplementary Figure 10, related to Figure 6C** OPA adds to the anti-MM activity of Dex

# Supplementary Figure 1, related to Figure 1

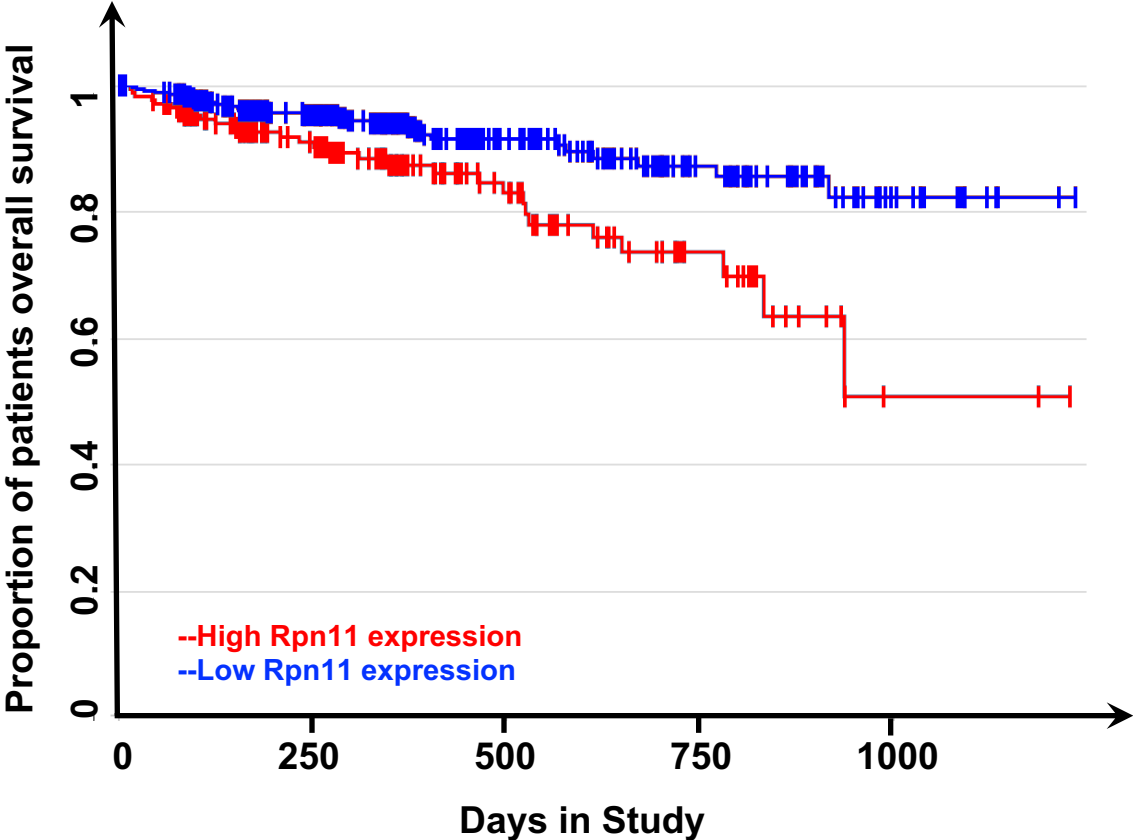

# Supplementary Figure 2, related to Figure 1

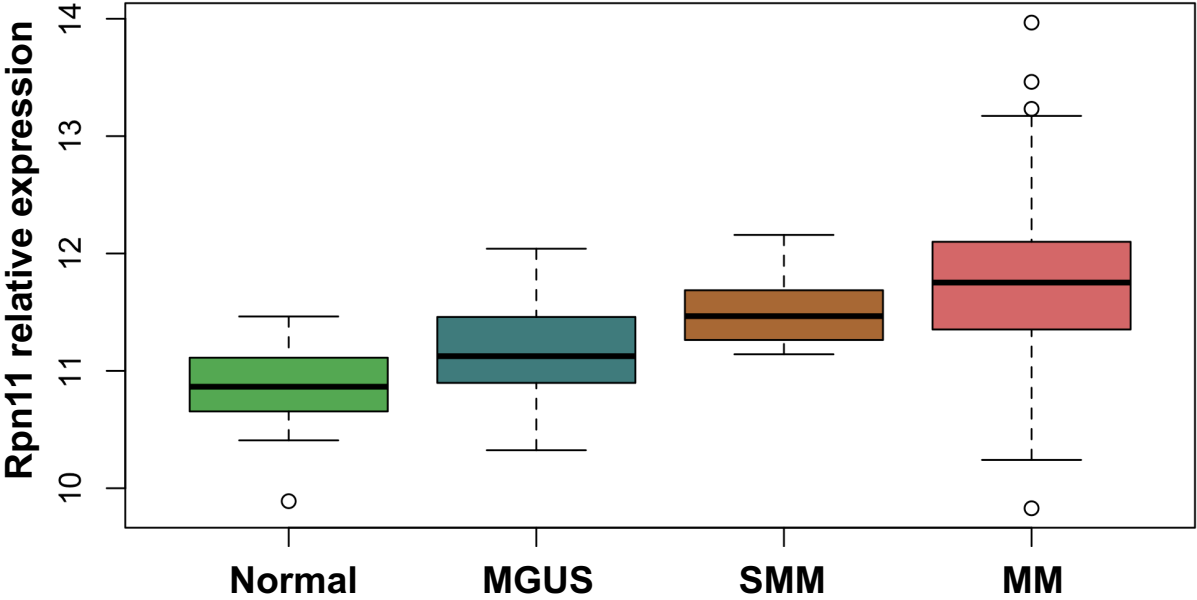

# Supplementary Figure 3, related to Figure 1

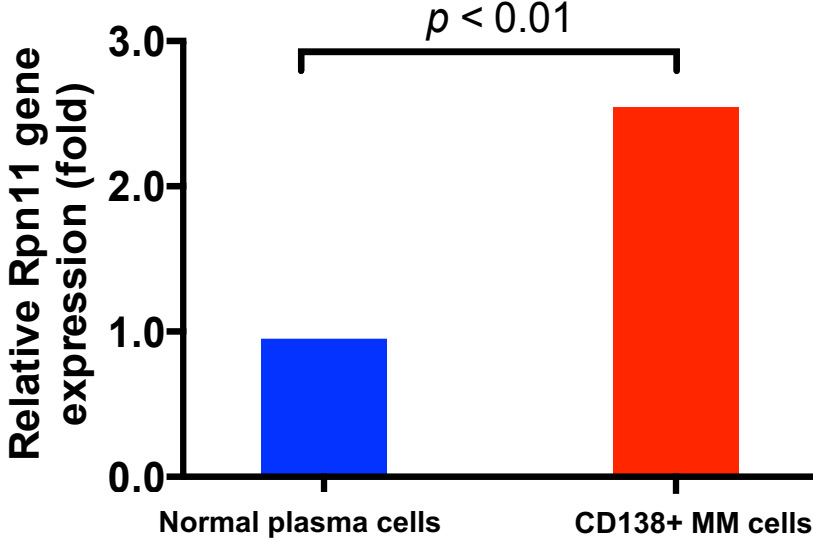

# Supplementary Figure 4, related to Figure 1

## Immunohistochemistry on Bone Marrow Biopsies

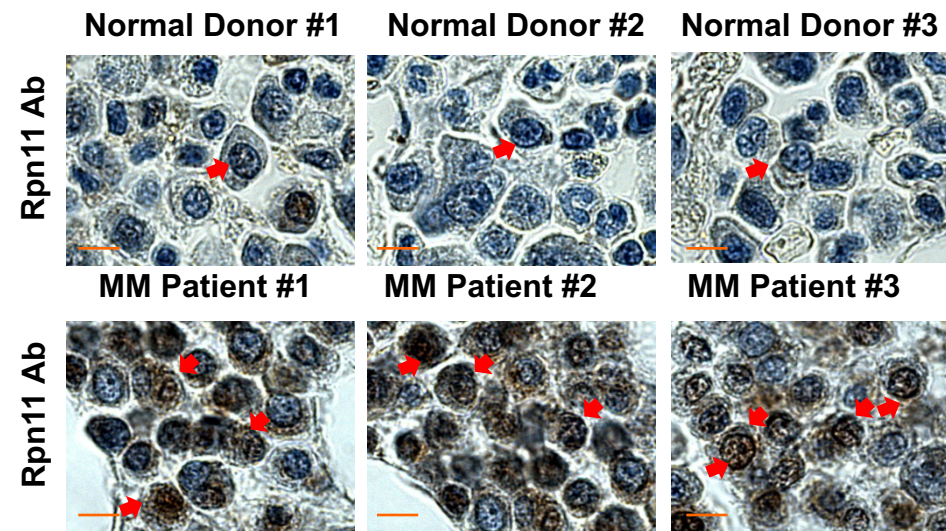

## Supplementary Figure 5, related to Figure 3

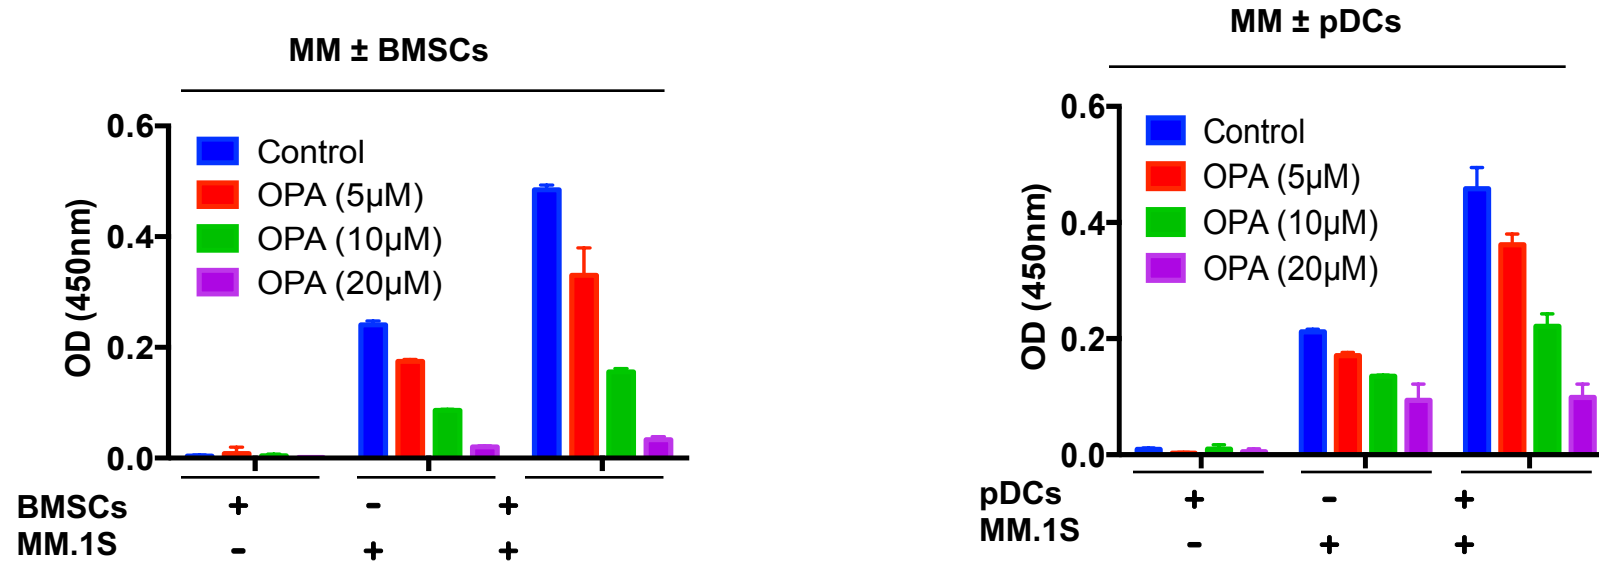

## Supplementary Figure 6, related to Figure 4

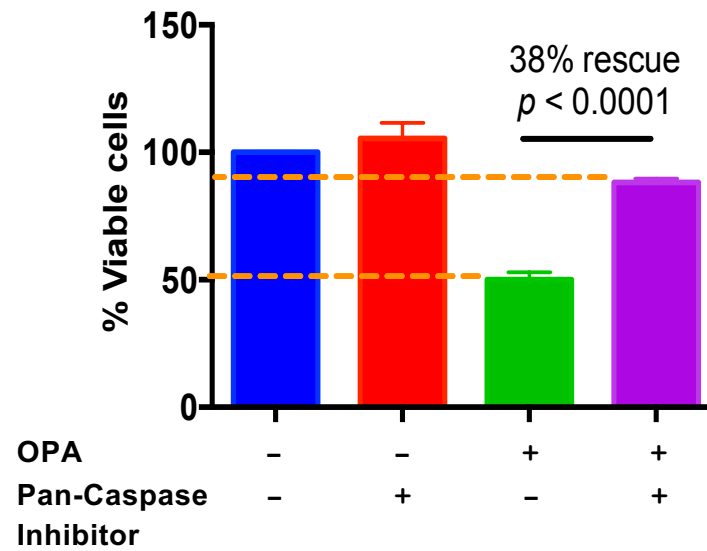

## Supplementary Figure 7, related to Figure 4

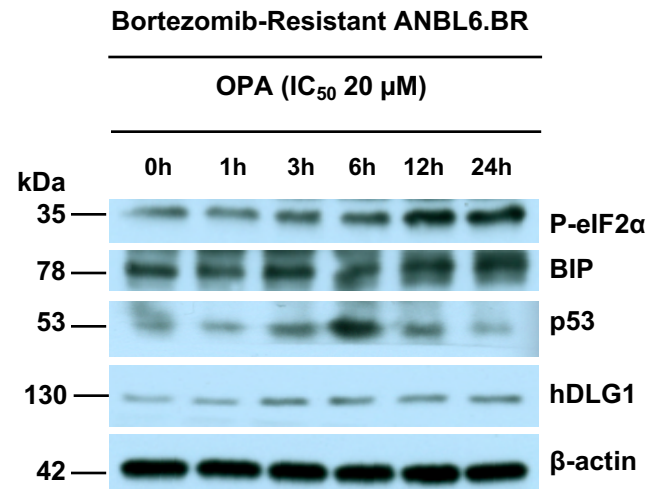



## Supplementary Figure 8, related to Figure 6A

|   | OPA ( $\mu\text{M}$ ) | OPA Fa | Lenalidomide ( $\mu\text{M}$ ) | Lenalidomide Fa | Fa   | CI    |
|---|-----------------------|--------|--------------------------------|-----------------|------|-------|
| 1 | 4                     | 0.93   | 1                              | 0.91            | 0.66 | 0.487 |
| 2 | 4                     | 0.93   | 3                              | 0.9             | 0.65 | 0.482 |
| 3 | 4                     | 0.93   | 5                              | 0.87            | 0.63 | 0.471 |
| 4 | 8                     | 0.63   | 1                              | 0.91            | 0.32 | 0.646 |
| 5 | 8                     | 0.63   | 3                              | 0.9             | 0.31 | 0.638 |
| 6 | 8                     | 0.63   | 5                              | 0.87            | 0.29 | 0.621 |
| 7 | 16                    | 0.33   | 1                              | 0.91            | 0.16 | 0.996 |
| 8 | 16                    | 0.33   | 3                              | 0.9             | 0.15 | 0.974 |
| 9 | 16                    | 0.33   | 5                              | 0.87            | 0.13 | 0.928 |

## Supplementary Figure 9, related to Figure 6B

|   | OPA ( $\mu\text{M}$ ) | OPA Fa | Pomalidomide ( $\mu\text{M}$ ) | Pomalidomide Fa | Fa   | CI    |
|---|-----------------------|--------|--------------------------------|-----------------|------|-------|
| 1 | 4                     | 0.93   | 1                              | 0.63            | 0.57 | 0.429 |
| 2 | 4                     | 0.93   | 3                              | 0.62            | 0.53 | 0.384 |
| 3 | 4                     | 0.93   | 5                              | 0.6             | 0.45 | 0.328 |
| 4 | 8                     | 0.63   | 1                              | 0.63            | 0.56 | 0.805 |
| 5 | 8                     | 0.63   | 3                              | 0.62            | 0.41 | 0.612 |
| 6 | 8                     | 0.63   | 5                              | 0.6             | 0.38 | 0.58  |
| 7 | 16                    | 0.33   | 1                              | 0.63            | 0.29 | 0.979 |
| 8 | 16                    | 0.33   | 3                              | 0.62            | 0.28 | 0.959 |
| 9 | 16                    | 0.33   | 5                              | 0.6             | 0.26 | 0.918 |

## Supplementary Figure 10, related to Figure 6C

|   | OPA ( $\mu\text{M}$ ) | OPA Fa | Dex (nM) | Dex Fa | Fa   | CI    |
|---|-----------------------|--------|----------|--------|------|-------|
| 1 | 4                     | 0.93   | 10       | 0.63   | 0.56 | 0.968 |
| 2 | 4                     | 0.93   | 20       | 0.56   | 0.45 | 0.859 |
| 3 | 4                     | 0.93   | 30       | 0.47   | 0.41 | 0.906 |
| 4 | 8                     | 0.63   | 10       | 0.63   | 0.44 | 0.838 |
| 5 | 8                     | 0.63   | 20       | 0.56   | 0.38 | 0.902 |
| 6 | 8                     | 0.63   | 30       | 0.47   | 0.35 | 0.935 |
| 7 | 16                    | 0.33   | 10       | 0.63   | 0.22 | 0.879 |
| 8 | 16                    | 0.33   | 20       | 0.56   | 0.19 | 0.835 |
| 9 | 16                    | 0.33   | 30       | 0.47   | 0.1  | 0.591 |
